# Supplementary material for: Prevalence of deleterious variants in cardiomyopathy genes in early-onset atrial fibrillation
Source: Research Square preprint supplement (doi:10.21203/rs.3.rs-7971912/v1), 2025-11-19
Supplement: Supplementary file 1 [file ad677feacee5a0f4a8b13182.pdf]

# Supplemental material

**Vad et al.**, Prevalence of deleterious variants in cardiomyopathy genes in early-onset atrial fibrillation

## Table of Content

|                                                                                                                                                                   |    |
|-------------------------------------------------------------------------------------------------------------------------------------------------------------------|----|
| Figure S1. Flowchart of the study design. ....                                                                                                                    | 2  |
| Figure S2. Venn diagram illustrating the distribution of Cardiomyopathy-associated genes examined in the study.....                                               | 3  |
| Figure S3. Percentage and odds ratio of participants carrying missense variants in cardiomyopathy genes based on age at AF diagnosis. ....                        | 4  |
| Figure S4. Distribution of rare missense variants in individuals diagnosed with AF according to genes and their association with different cardiomyopathies. .... | 5  |
| Table S1. Phenotype definitions according to the <i>International Classification of Diseases, 10<sup>th</sup> revision</i> (ICD-10). ....                         | 6  |
| Table S2. Prevalence of predicted Loss-of-Function variants in <i>TTN</i> in the Danish early-onset AF cohort. ....                                               | 7  |
| Table S3. Prevalence of predicted Loss-of-Function variants in non- <i>TTN</i> genes in the Danish early-onset AF cohort. ....                                    | 8  |
| Table S4. Truncating variant carrier counts in UK Biobank for different AF onset groups and entire study population.....                                          | 9  |
| Table S5. Missense variant carrier counts in UK Biobank for different AF onset groups and entire study population.....                                            | 10 |
| Table S6. Count and percentage of carriers of each genetic variant, truncating or missense, from the different age groups of the UK Biobank.....                  | 11 |

**Figure S1. Flowchart of the study design.**

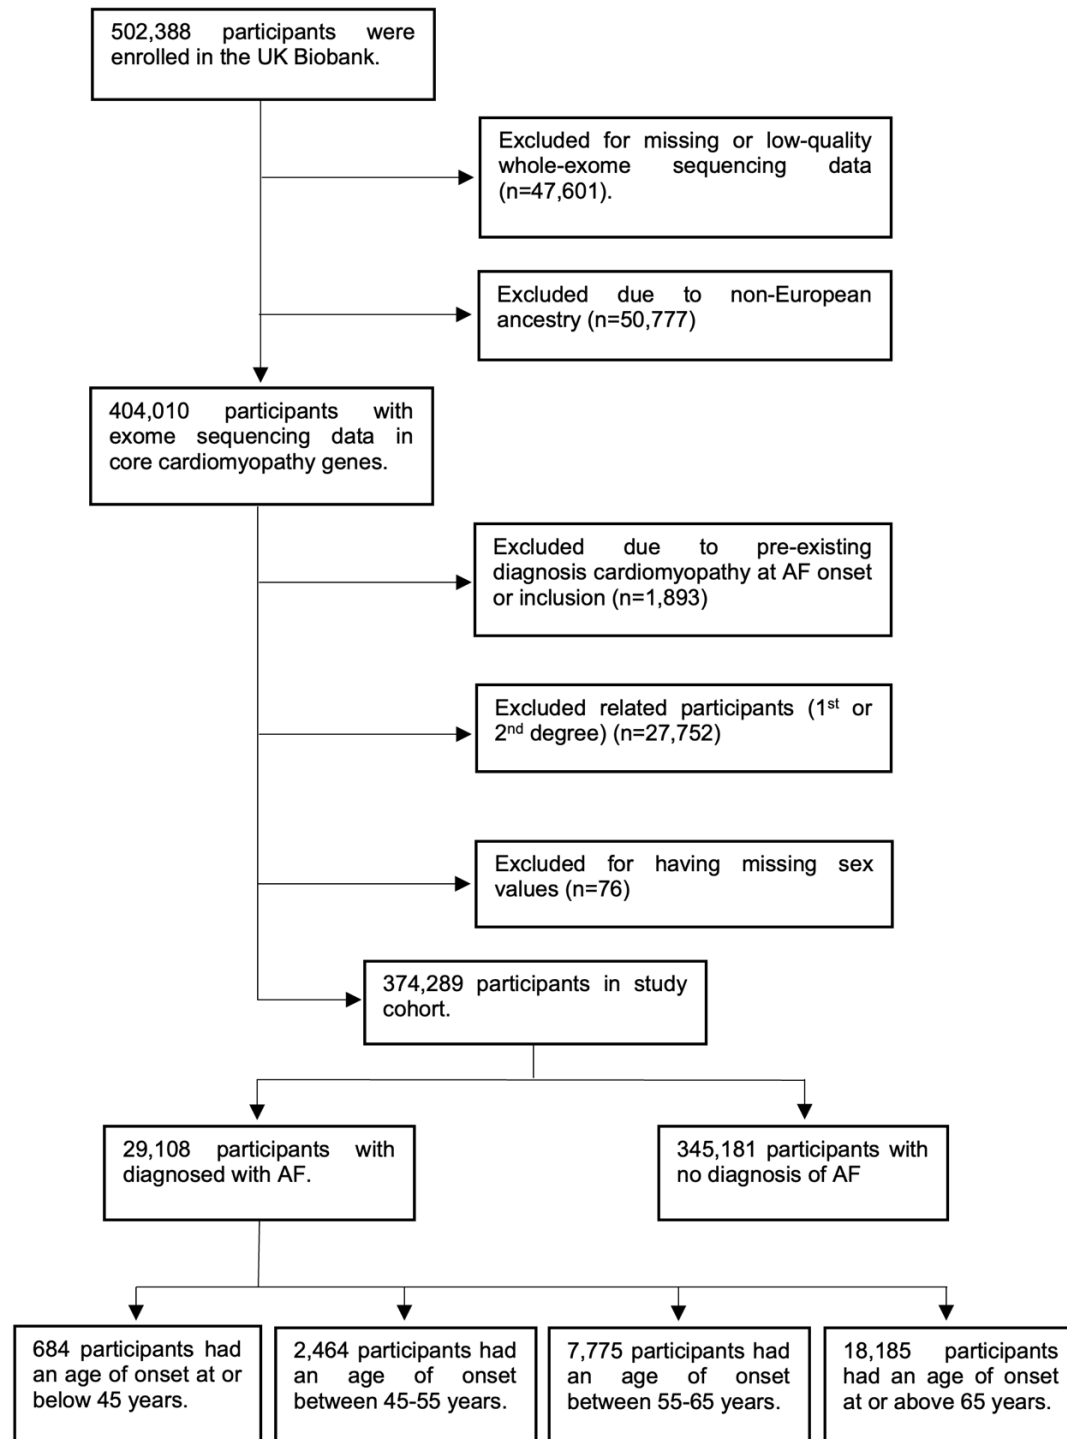

AF: Atrial Fibrillation

**Figure S2. Venn diagram illustrating the distribution of Cardiomyopathy-associated genes examined in the study.**

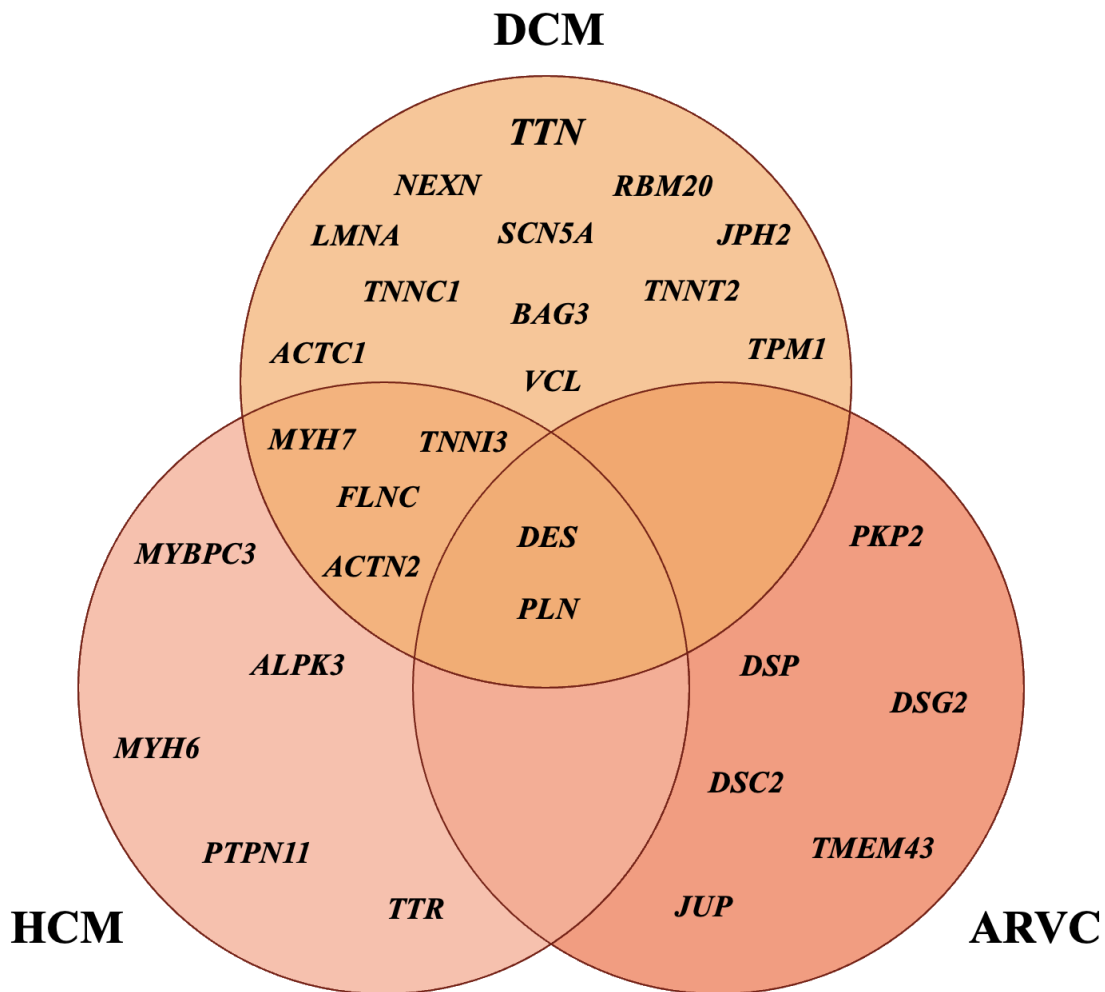

Distribution of genes by their association with either hypertrophic cardiomyopathy (HCM), dilated cardiomyopathy (DCM), and arrhythmogenic right ventricular cardiomyopathy (ARVC).

**Figure S3. Percentage and odds ratio of participants carrying missense variants in cardiomyopathy genes based on age at AF diagnosis.**

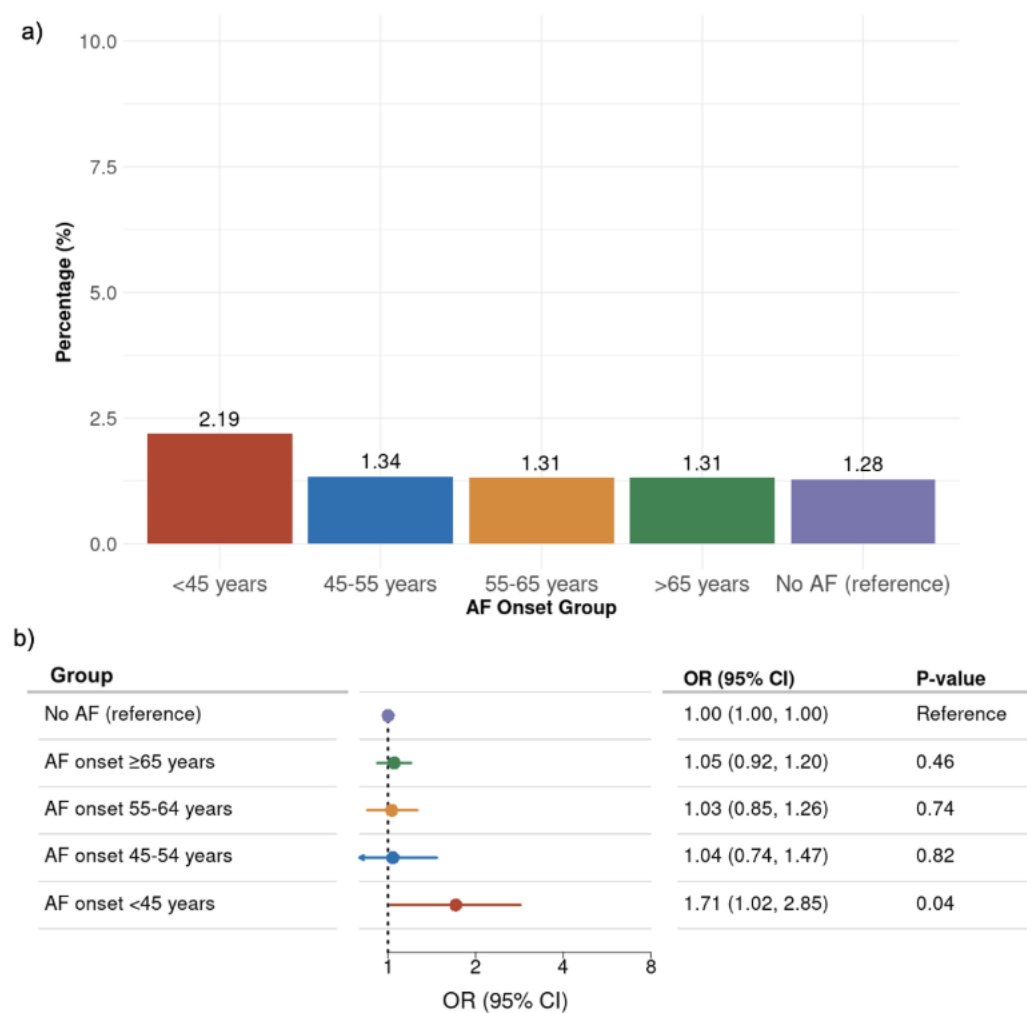

**Figure S3a:** UK Biobank data showing rare missense variant carrier percentage, specifically for MTR below the 5<sup>th</sup> percentile, stratified by age at AF onset. The highest prevalence of carriers is observed among individuals with AF onset before 45 years (red), while the lowest is seen in individuals with onset of AF at or after 65 years of age (green) or no diagnosis (purple).

**Figure S3b:** Forest plot displaying odds ratios (ORs), confidence intervals (CI) and p-values for missense MTR below the 5<sup>th</sup> percentile carriers in the UK Biobank.

**Figure S4. Distribution of rare missense variants in individuals diagnosed with AF according to genes and their association with different cardiomyopathies.**

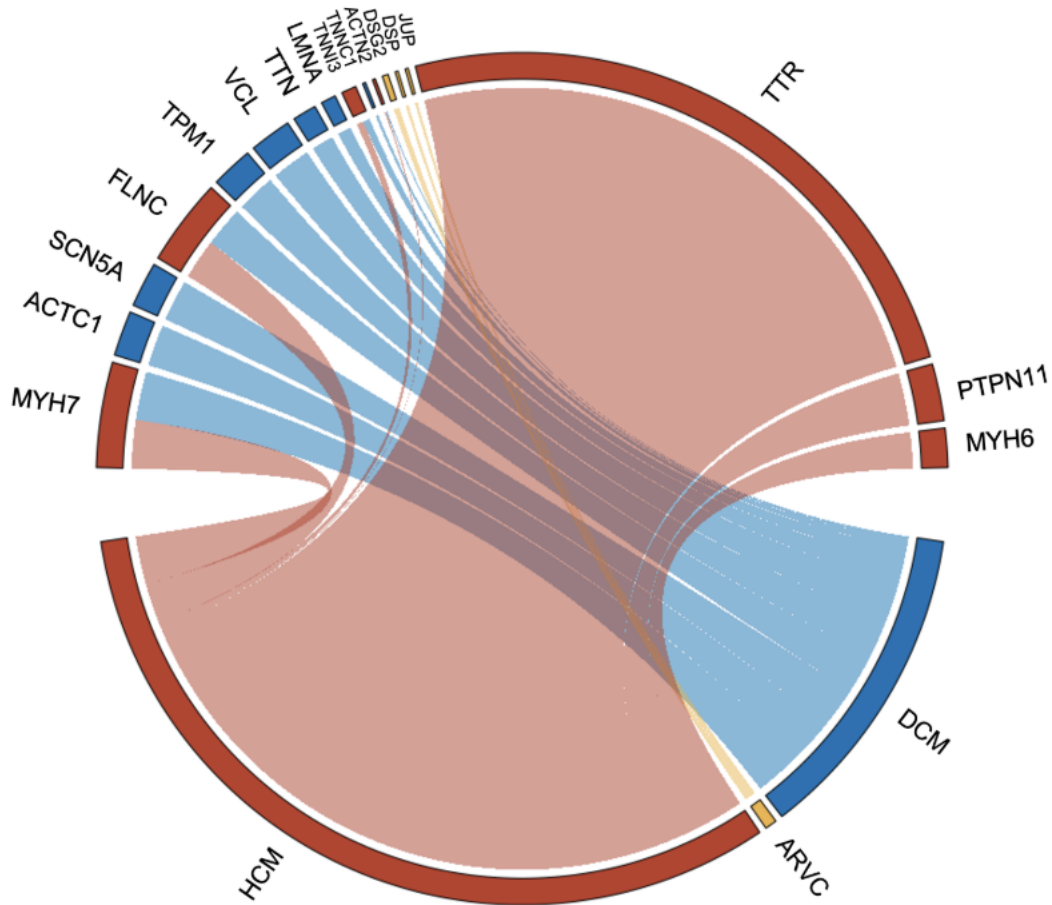

The blue segments represent variants in genes associated with dilated cardiomyopathy (DCM), the red segments correspond to variants in hypertrophic cardiomyopathy (HCM)-associated genes, and the yellow segments indicate variants in genes associated with arrhythmogenic right ventricular cardiomyopathy (ARVC).

**Table S1. Phenotype definitions according to the *International Classification of Diseases, 10<sup>th</sup> revision* (ICD-10).**

| Phenotypes                    | UK Biobank data field  | ICD-10 code   |
|-------------------------------|------------------------|---------------|
| Sex                           | 31, 22001              | –             |
| Ethnic background             | 21000                  | –             |
| Body Mass Index               | 21001                  | –             |
| Diabetes                      | 130706, 130708, 130714 | E10, E11, E14 |
| Atrial Fibrillation           | 131350                 | I48           |
| Cardiomyopathy                | 131338                 | I42           |
| Heart Failure                 | 131354                 | I50           |
| Diastolic Blood pressure      | 4079                   | –             |
| Systolic Blood Pressure       | 4080                   | –             |
| Hypertension                  | 131286                 | I10           |
| Principal Components, 1 to 10 | 22009                  | –             |

**Table S2. Prevalence of predicted Loss-of-Function variants in *TTN* in the Danish early-onset AF cohort.**

| Gene       | Mutation Type        | Variant ID                               | Clinical Significance | Allele Count |
|------------|----------------------|------------------------------------------|-----------------------|--------------|
| <i>TTN</i> | Frameshift           | chr2:179398385 TG>T                      | VUS                   | 1            |
| <i>TTN</i> | Frameshift           | chr2:179398541 C>CT                      | VUS                   | 2            |
| <i>TTN</i> | Nonsense             | chr2:179398832 C>T                       | P/LP                  | 1            |
| <i>TTN</i> | Frameshift           | chr2:179404492 CT>C                      | P/LP                  | 1            |
| <i>TTN</i> | Nonsense             | chr2:179416407 AG>A                      | LP                    | 1            |
| <i>TTN</i> | Splice donor variant | chr2:179418639 A>C                       | P                     | 2            |
| <i>TTN</i> | Nonsense             | chr2:179425041 A>T                       | P                     | 1            |
| <i>TTN</i> | Nonsense             | chr2:179431758 A>T                       | VUS                   | 1            |
| <i>TTN</i> | Frameshift           | chr2:179437869 TG>T                      | VUS                   | 1            |
| <i>TTN</i> | Frameshift           | chr2:179459103 C>CA                      | P/LP                  | 2            |
| <i>TTN</i> | Nonsense             | chr2:179460360 G>A                       | VUS                   | 1            |
| <i>TTN</i> | Nonsense             | rs72646828                               | P/LP                  | 1            |
| <i>TTN</i> | Splice donor variant | chr2:179474814 T>TA                      | VUS                   | 1            |
| <i>TTN</i> | Nonsense             | chr2:179477082 G>A                       | P/LP                  | 2            |
| <i>TTN</i> | Nonsense             | rs140743001                              | P/LP                  | 1            |
| <i>TTN</i> | Nonsense             | chr2:179495596 C>A                       | VUS                   | 1            |
| <i>TTN</i> | Frameshift           | chr2:179501177 AAC>A                     | VUS                   | 1            |
| <i>TTN</i> | Splice donor variant | rs546105899                              | VUS                   | 1            |
| <i>TTN</i> | Frameshift           | chr2:179569604 CTCTG>C                   | VUS                   | 1            |
| <i>TTN</i> | Nonsense             | chr2:179605689 G>A                       | VUS                   | 1            |
| <i>TTN</i> | Nonsense             | chr2:179606008 G>T                       | VUS                   | 1            |
| <i>TTN</i> | Frameshift           | chr2:179606444<br>AGTGTAGCCACATCCCCCAT>A | VUS                   | 1            |
| <i>TTN</i> | Frameshift           | rs781363456                              | VUS                   | 1            |
| <i>TTN</i> | Frameshift           | chr2:179632504 AC>A                      | VUS                   | 1            |
| <i>TTN</i> | Frameshift           | chr2:179665309 TG>T                      | VUS                   | 1            |

AF: Atrial Fibrillation

P: Pathogenic

LP: Likely pathogenic

VUS: Variant of uncertain significance

TTN: *TTN* PSI>90

**Table S3. Prevalence of predicted Loss-of-Function variants in non-*TTN* genes in the Danish early-onset AF cohort.**

| Gene          | Mutation Type           | Variant ID                    | Clinical Significance | Allele Count |
|---------------|-------------------------|-------------------------------|-----------------------|--------------|
| <b>LMNA</b>   | Splice acceptor variant | rs775312747                   | VUS                   | 1            |
| <b>LMNA</b>   | Frameshift              | rs863225024                   | P                     | 1            |
| <b>LMNA</b>   | Frameshift              | rs941656503                   | VUS                   | 1            |
| <b>SCN5A</b>  | Nonsense                | chr3:38595811 C>T             | P                     | 1            |
| <b>RBM20</b>  | Frameshift              | chr10:112572320<br>A>AGTTGGAC | VUS                   | 1            |
| <b>RBM20</b>  | Nonsense                | chr10:112572514 G>T           | VUS                   | 1            |
| <b>MYBPC3</b> | Splice donor variant    | rs397516073                   | P                     | 1            |
| <b>PKP2</b>   | Splice donor variant    | chr12:32996115 C>A            | VUS                   | 1            |
| <b>MYH7</b>   | Nonsense                | chr14:23900862 G>A            | VUS                   | 1            |
| <b>TPM1</b>   | Frameshift              | chr15:63335123 C>CG           | VUS                   | 1            |
| <b>TPM1</b>   | Stop lost               | rs139159081                   | VUS                   | 1            |
| <b>DSC2</b>   | Nonsense                | chr18:28649072 G>A            | VUS                   | 1            |
| <b>DSC2</b>   | Splice acceptor variant | rs1371049672                  | VUS                   | 1            |

AF: Atrial Fibrillation

P: Pathogenic

LP: Likely pathogenic

VUS: Variant of uncertain significance

**Table S4. Truncating variant carrier counts in UK Biobank for different AF onset groups and entire study population.**

| Gene          | AF onset <45 years (n%),<br>n = 684 | AF population (n%),<br>n = 29,108 | Total population (n%),<br>n = 374,289 |
|---------------|-------------------------------------|-----------------------------------|---------------------------------------|
| <i>TTN*</i>   | 15 (2.19%)                          | 210 (0.72%)                       | 1060 (0.28%)                          |
| <i>PKP2</i>   | 2 (0.29%)                           | 70 (0.24%)                        | 502 (0.13%)                           |
| <i>ALPK3</i>  | 1 (0.14%)                           | 58 (0.20%)                        | 705 (0.19%)                           |
| <i>NEXN</i>   | 0 (0%)                              | 29 (0.10%)                        | 261 (0.07%)                           |
| <i>MYH7</i>   | 0 (0%)                              | 23 (0.08%)                        | 318 (0.08%)                           |
| <i>RBM20</i>  | 1 (0.14%)                           | 22 (0.08%)                        | 152 (0.04%)                           |
| <i>MYH6</i>   | 0 (0%)                              | 22 (0.08%)                        | 247 (0.07%)                           |
| <i>TNNT2</i>  | 0 (0%)                              | 21 (0.08%)                        | 285 (0.08%)                           |
| <i>DSP</i>    | 3 (0.44%)                           | 17 (0.06%)                        | 217 (0.06%)                           |
| <i>MYBPC3</i> | 0 (0%)                              | 17 (0.06%)                        | 145 (0.04%)                           |
| <i>DSG2</i>   | 0 (0%)                              | 16 (0.05%)                        | 230 (0.06%)                           |
| <i>SCN5A</i>  | 0 (0%)                              | 16 (0.05%)                        | 171 (0.05%)                           |
| <i>FLNC</i>   | 1 (0.14%)                           | 13 (0.04%)                        | 78 (0.02%)                            |
| <i>TMEM43</i> | 1 (0.14%)                           | 12 (0.04%)                        | 125 (0.03%)                           |
| <i>TNNI3</i>  | 0 (0%)                              | 12 (0.04%)                        | 95 (0.03%)                            |
| <i>VCL</i>    | 1 (0.14%)                           | 12 (0.04%)                        | 124 (0.03%)                           |
| <i>TPM1</i>   | 0 (0%)                              | 11 (0.04%)                        | 114 (0.03%)                           |
| <i>ACTN2</i>  | 1 (0.14%)                           | 10 (0.03%)                        | 68 (0.02%)                            |
| <i>DES</i>    | 0 (0%)                              | 10 (0.03%)                        | 84 (0.02%)                            |
| <i>DSC2</i>   | 0 (0%)                              | 8 (0.03%)                         | 145 (0.04%)                           |
| <i>JUP</i>    | 0 (0%)                              | 6 (0.02%)                         | 70 (0.02%)                            |
| <i>LMNA</i>   | 0 (0%)                              | 6 (0.02%)                         | 82 (0.02%)                            |
| <i>PTPN11</i> | 0 (0%)                              | 4 (0.01%)                         | 25 (0.01%)                            |
| <i>ACTC1</i>  | 0 (0%)                              | 3 (0.01%)                         | 33 (0.01%)                            |
| <i>JPH2</i>   | 0 (0%)                              | 3 (0.01%)                         | 77 (0.02%)                            |
| <i>PLN</i>    | 0 (0%)                              | 3 (0.01%)                         | 23 (0.01%)                            |
| <i>TNNC1</i>  | 0 (0%)                              | 3 (0.01%)                         | 26 (0.01%)                            |
| <i>BAG3</i>   | 1 (0.14%)                           | 1 (0.003%)                        | 20 (0.005%)                           |
| <i>TTR</i>    | 0 (0%)                              | 1 (0.003%)                        | 15 (0.004%)                           |

AF: Atrial Fibrillation

*TTN\**: *TTN* PSI>90

n: number of carriers

**Table S5. Missense variant carrier counts in UK Biobank for different AF onset groups and entire study population.**

| Gene          | AF onset <45 years (n%),<br>n = 684 | AF population (n%),<br>n = 29,108 | Total population (n%),<br>n = 374,289 |
|---------------|-------------------------------------|-----------------------------------|---------------------------------------|
| <i>TTR</i>    | 6 (0.87%)                           | 214 (0.73%)                       | 2814 (0.75%)                          |
| <i>MYH7</i>   | 1 (0.14%)                           | 35 (0.12%)                        | 486 (0.13%)                           |
| <i>FLNC</i>   | 1 (0.14%)                           | 29 (0.10%)                        | 310 (0.08%)                           |
| <i>PTPN11</i> | 1 (0.14%)                           | 19 (0.06%)                        | 198 (0.05%)                           |
| <i>SCN5A</i>  | 0 (0%)                              | 15 (0.05%)                        | 194 (0.05%)                           |
| <i>MYH6</i>   | 1 (0.14%)                           | 13 (0.04%)                        | 135 (0.03%)                           |
| <i>VCL</i>    | 1 (0.14%)                           | 14 (0.05%)                        | 134 (0.03%)                           |
| <i>ACTC1</i>  | 2 (0.29%)                           | 15 (0.05%)                        | 111 (0.03%)                           |
| <i>TPM1</i>   | 1 (0.14%)                           | 14 (0.05%)                        | 104 (0.03%)                           |
| <i>TTN</i>    | 0 (0%)                              | 8 (0.02%)                         | 87 (0.02%)                            |
| <i>TNNI3</i>  | 0 (0%)                              | 5 (0.02%)                         | 59 (0.02%)                            |
| <i>DSG2</i>   | 0 (0%)                              | 2 (0.01%)                         | 44 (0.01%)                            |
| <i>TNNC1</i>  | 0 (0%)                              | 1 (0.003%)                        | 42 (0.01%)                            |
| <i>ACTN2</i>  | 0 (0%)                              | 1 (0.003%)                        | 34 (0.009%)                           |
| <i>LMNA</i>   | 1 (0.14%)                           | 5 (0.02%)                         | 33 (0.008%)                           |
| <i>DSP</i>    | 0 (0%)                              | 1 (0.003%)                        | 26 (0.007%)                           |
| <i>JUP</i>    | 0 (0%)                              | 1 (0.003%)                        | 13 (0.003%)                           |
| <i>DES</i>    | 0 (0%)                              | 0 (0%)                            | 8 (0.002%)                            |
| <i>TNNT2</i>  | 0 (0%)                              | 0 (0%)                            | 2 (<0.001%)                           |

AF: Atrial Fibrillation

TTN\*: TTN PSI>90

n: number of carriers

**Table S6. Count and percentage of carriers of each genetic variant, truncating or missense, from the different age groups of the UK Biobank.**

| Group                                          | Carriers of Genetic Variant |               |               |
|------------------------------------------------|-----------------------------|---------------|---------------|
|                                                | Truncating (n%)             | Missense (n%) | Combined (n%) |
| <b>AF onset &lt;45 years, n = 684</b>          | 26 (3.80%)                  | 15 (2.19%)    | 41 (5.99%)    |
| <b>AF onset 45-54 years, n = 2,464</b>         | 64 (2.59%)                  | 33 (1.34%)    | 95 (3.85%)    |
| <b>AF onset 55-64 years, n = 7,775</b>         | 175 (2.25%)                 | 102 (1.31%)   | 274 (3.52%)   |
| <b>AF onset at or &gt;65 years, n = 18,185</b> | 369 (2.02%)                 | 239 (1.31%)   | 600 (3.29%)   |
| <b>No AF (reference), n = 345,181</b>          | 4,821 (1.39%)               | 4,427 (1.28%) | 9,195 (2.66%) |

*AF: Atrial Fibrillation*

*n: number of carriers*
